# Supplementary material
Source: PubMed Central journal article supplement (PMC4808520)

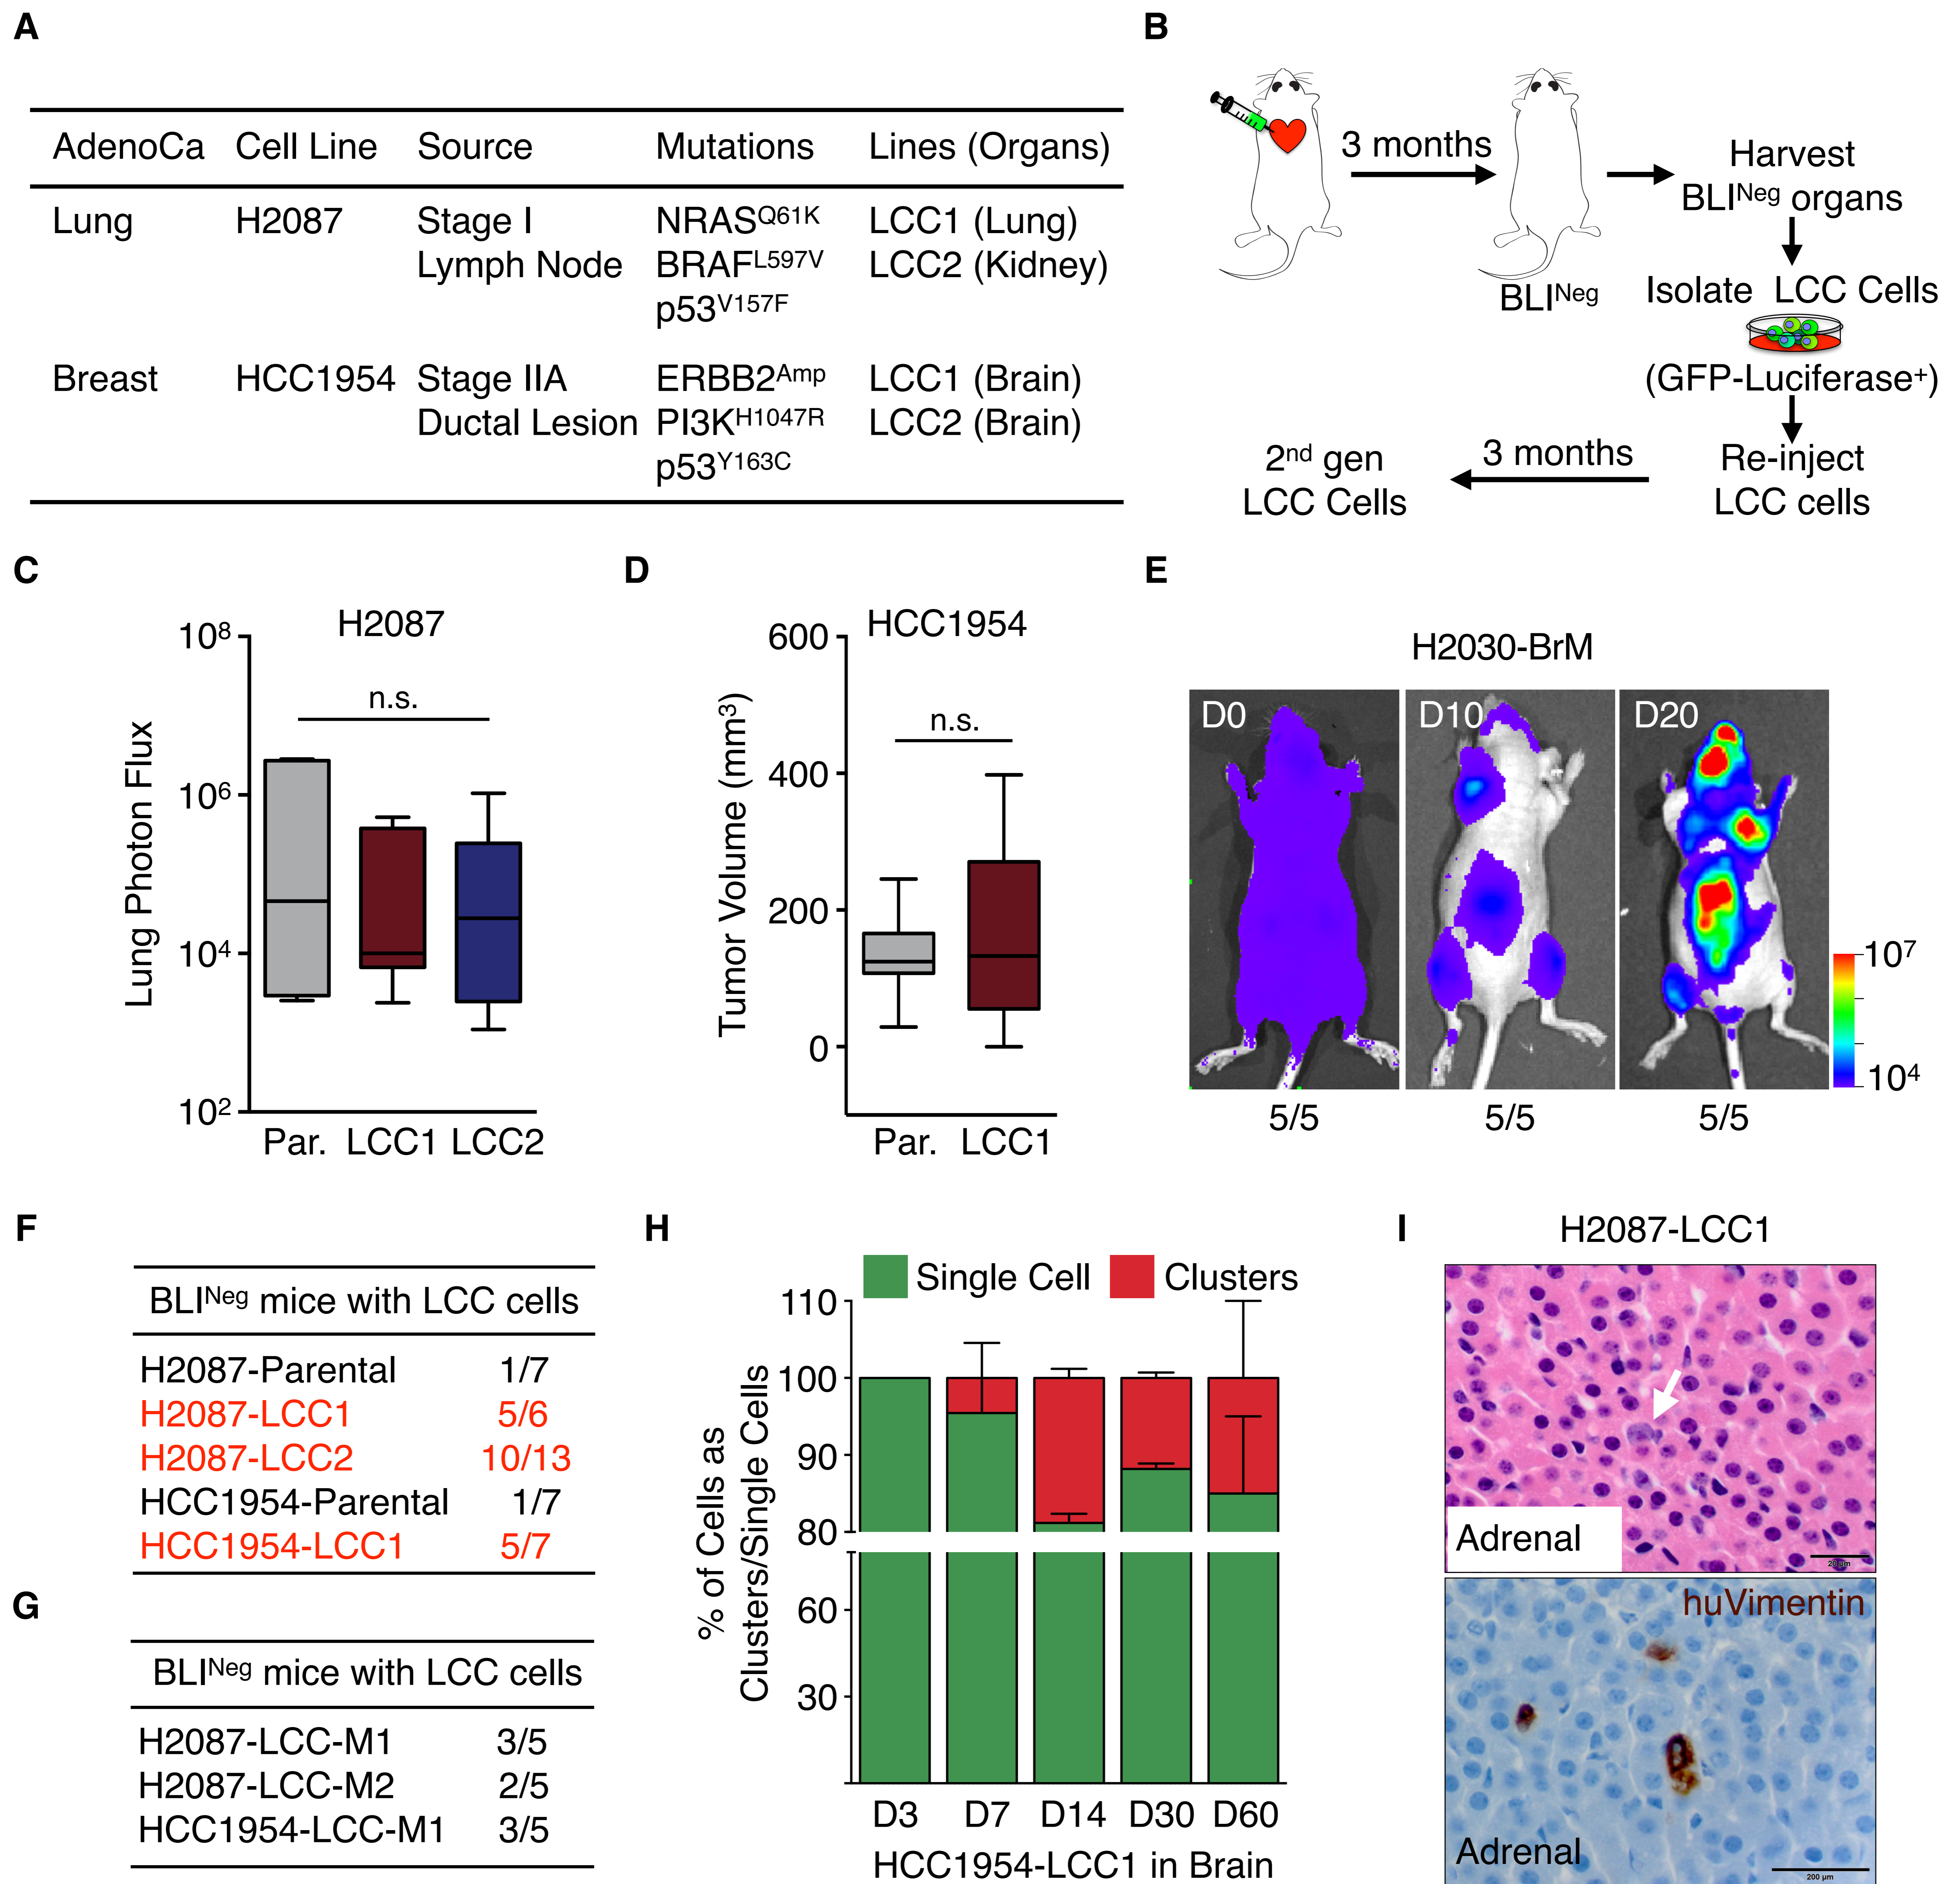

Supplement: NIHMS768018-supplement-3.pdf [file NIHMS768018-supplement-3.pdf]

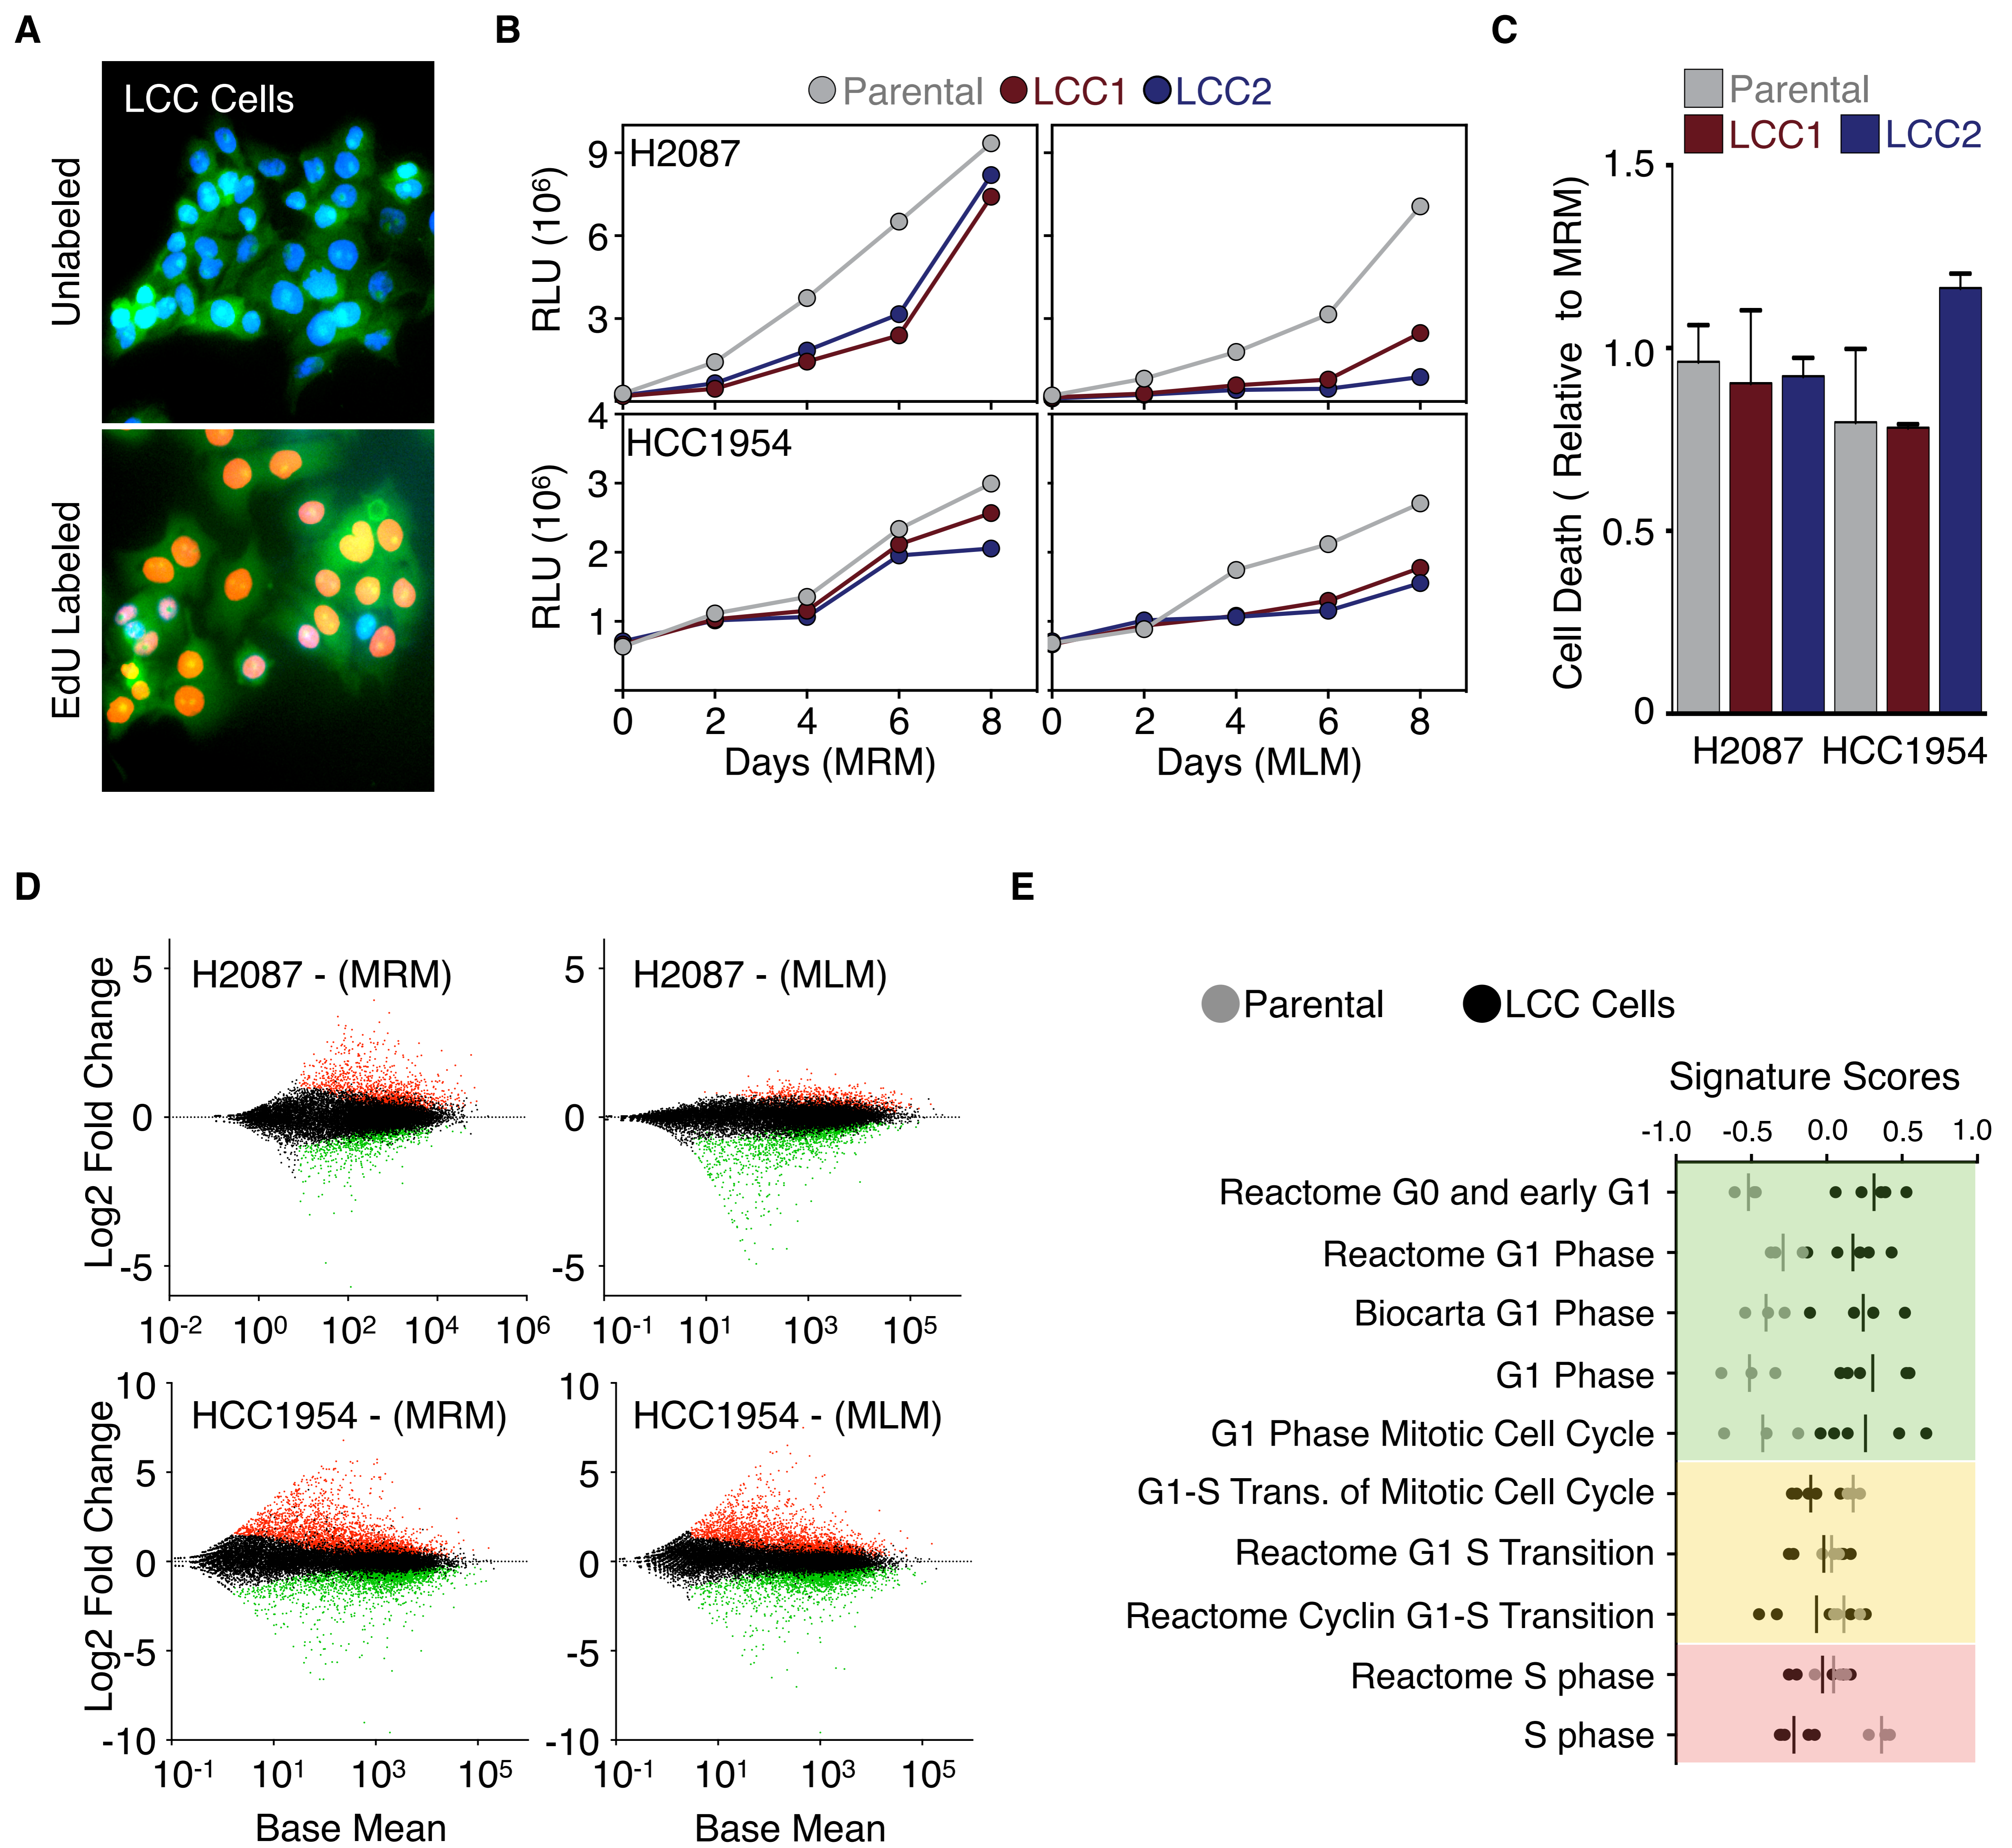

Supplement: NIHMS768018-supplement-4.pdf [file NIHMS768018-supplement-4.pdf]

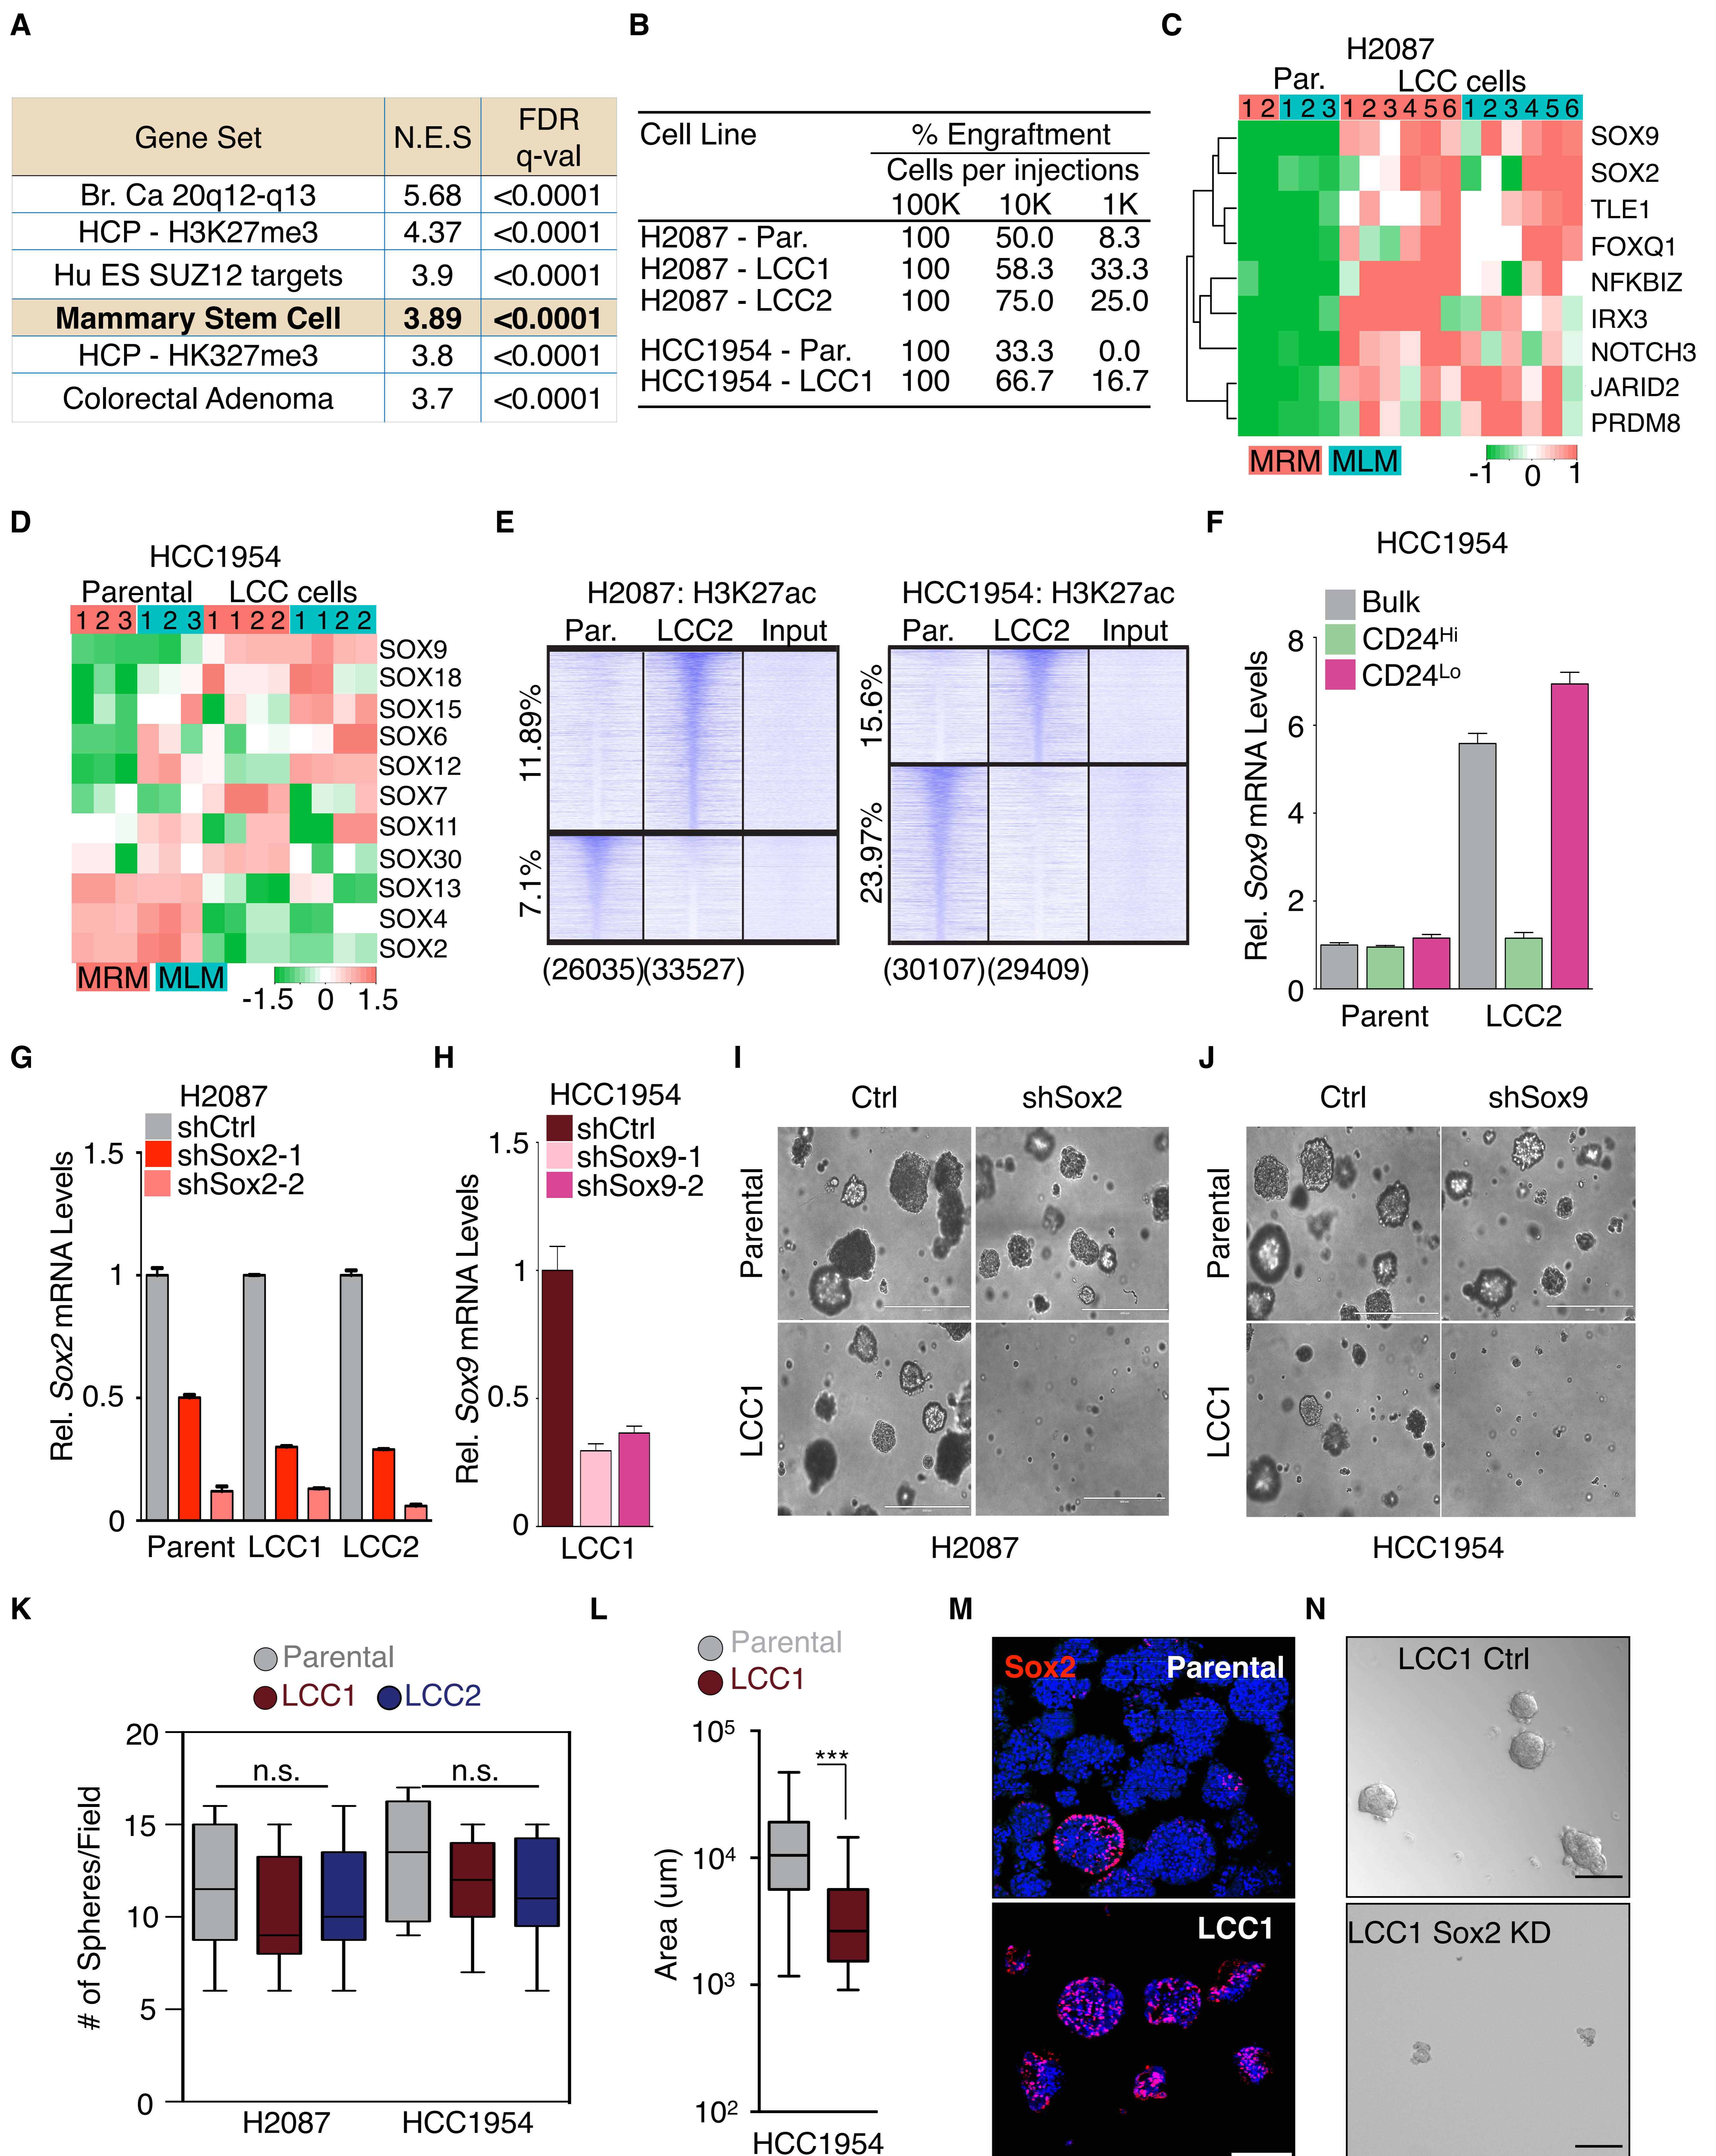

Supplement: NIHMS768018-supplement-5.pdf [file NIHMS768018-supplement-5.pdf]

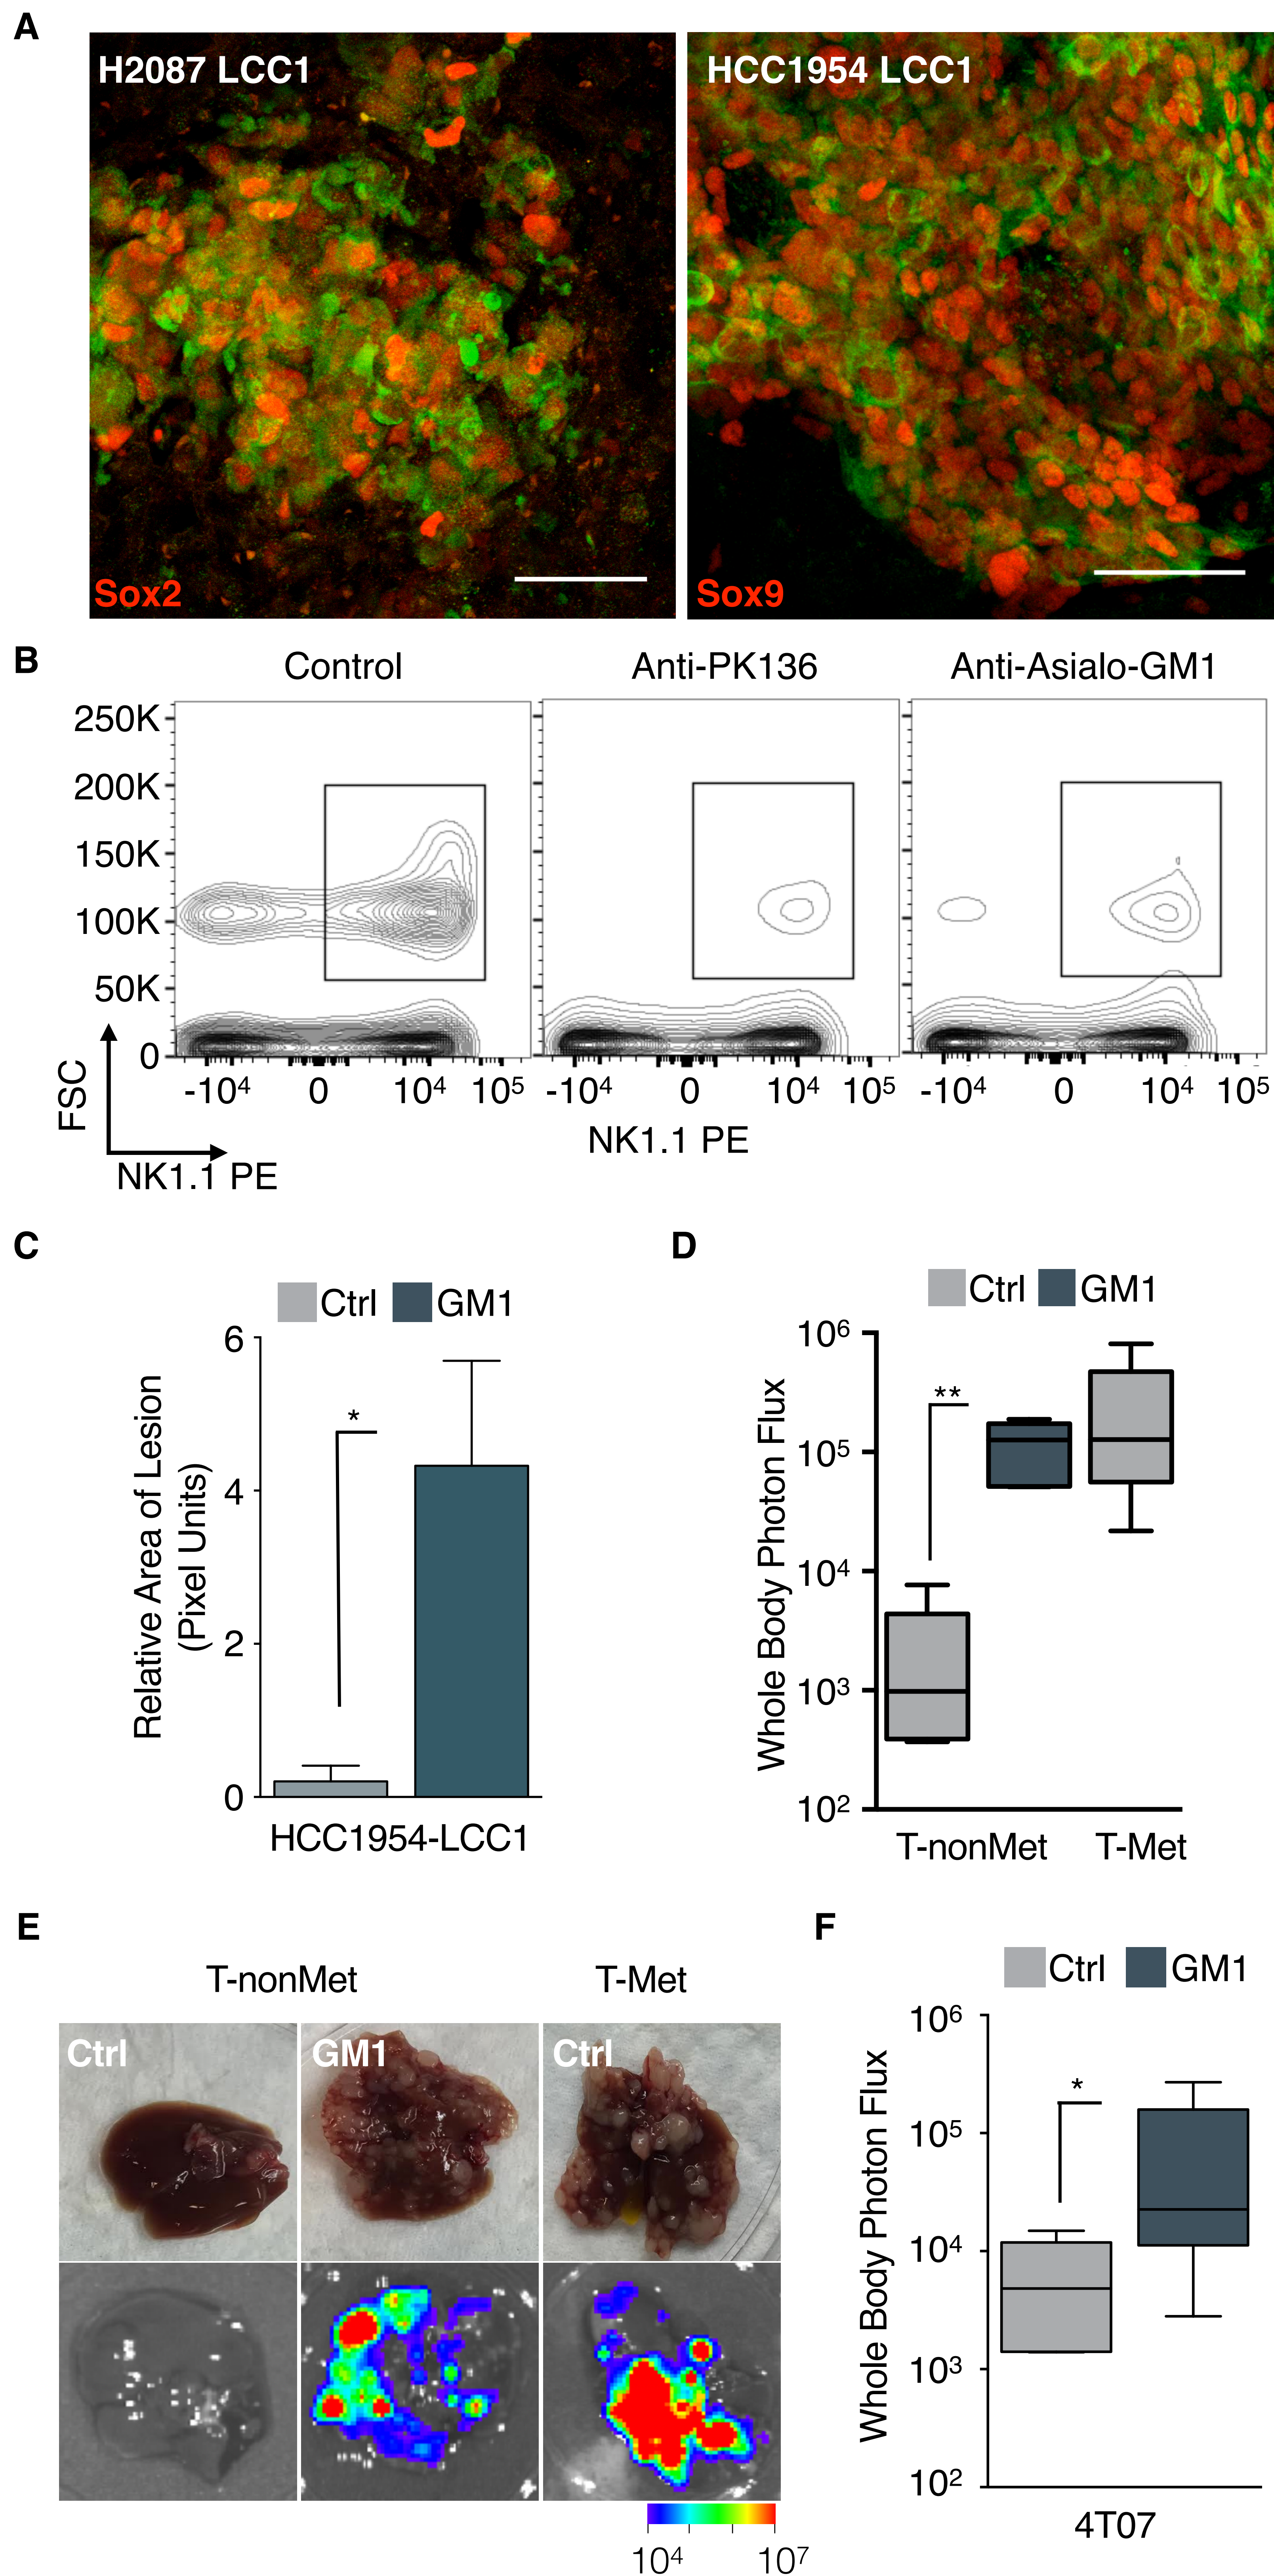

Supplement: NIHMS768018-supplement-6.pdf [file NIHMS768018-supplement-6.pdf]

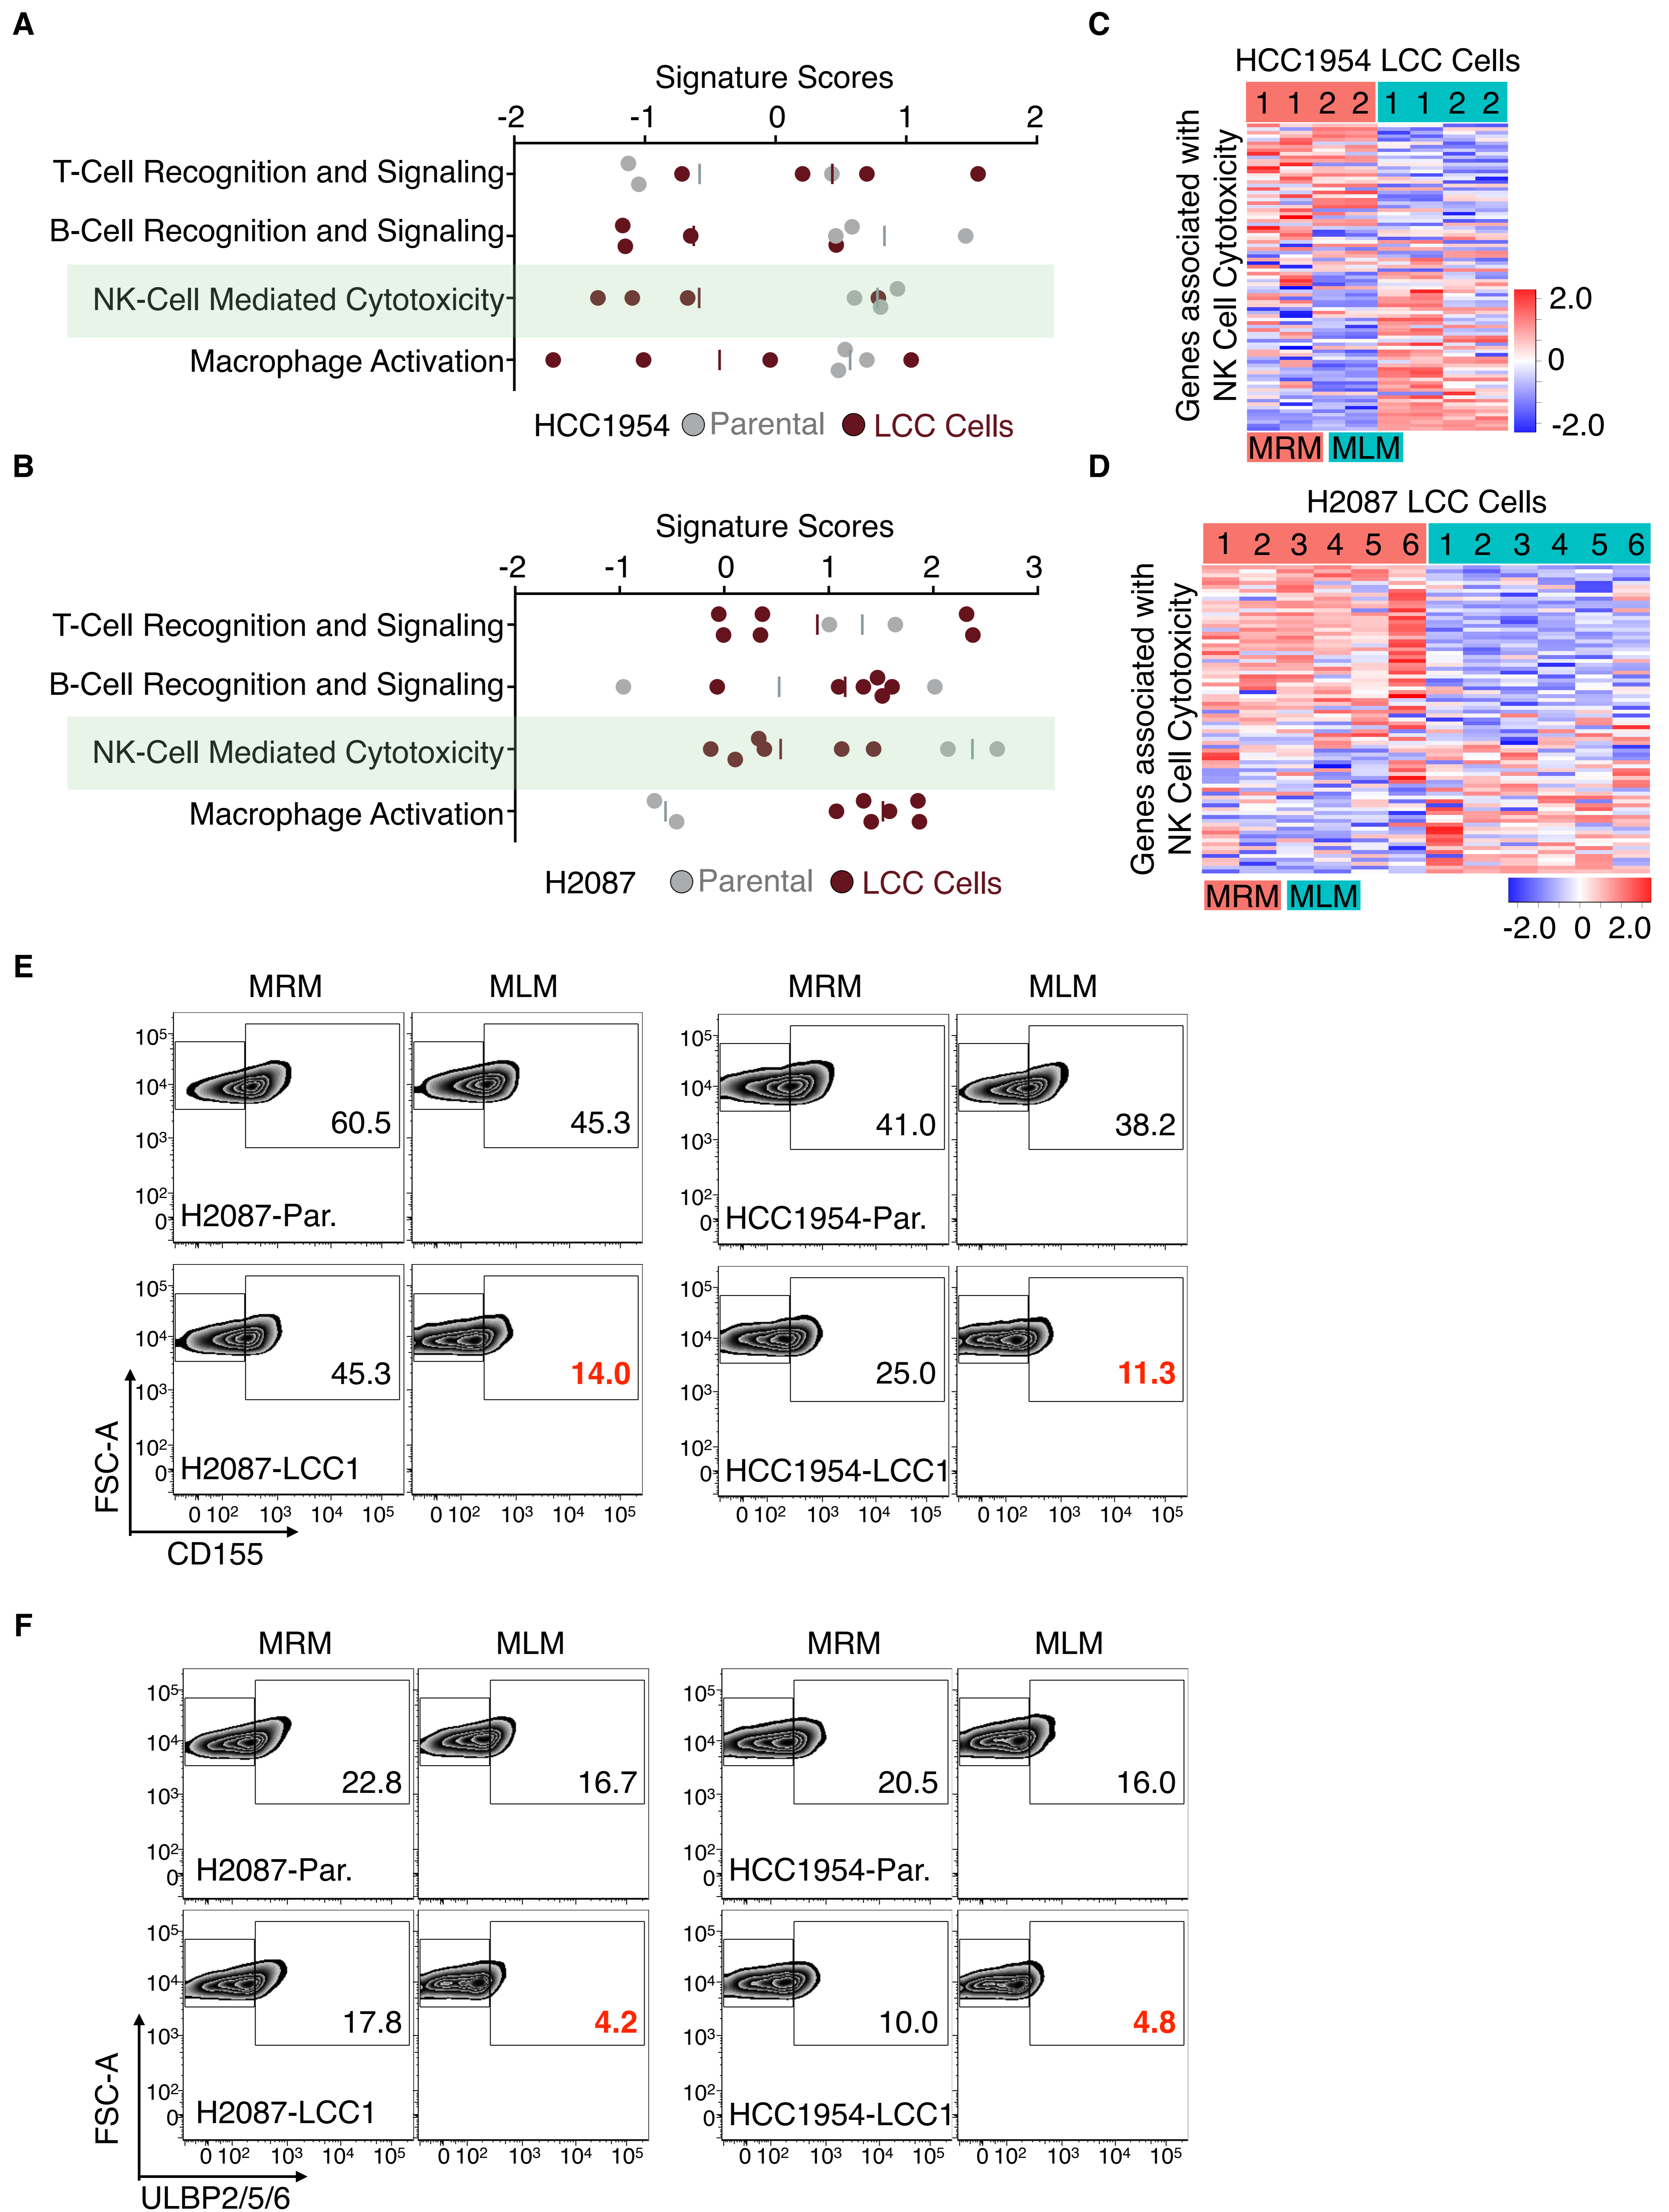

Supplement: NIHMS768018-supplement-7.pdf [file NIHMS768018-supplement-7.pdf]

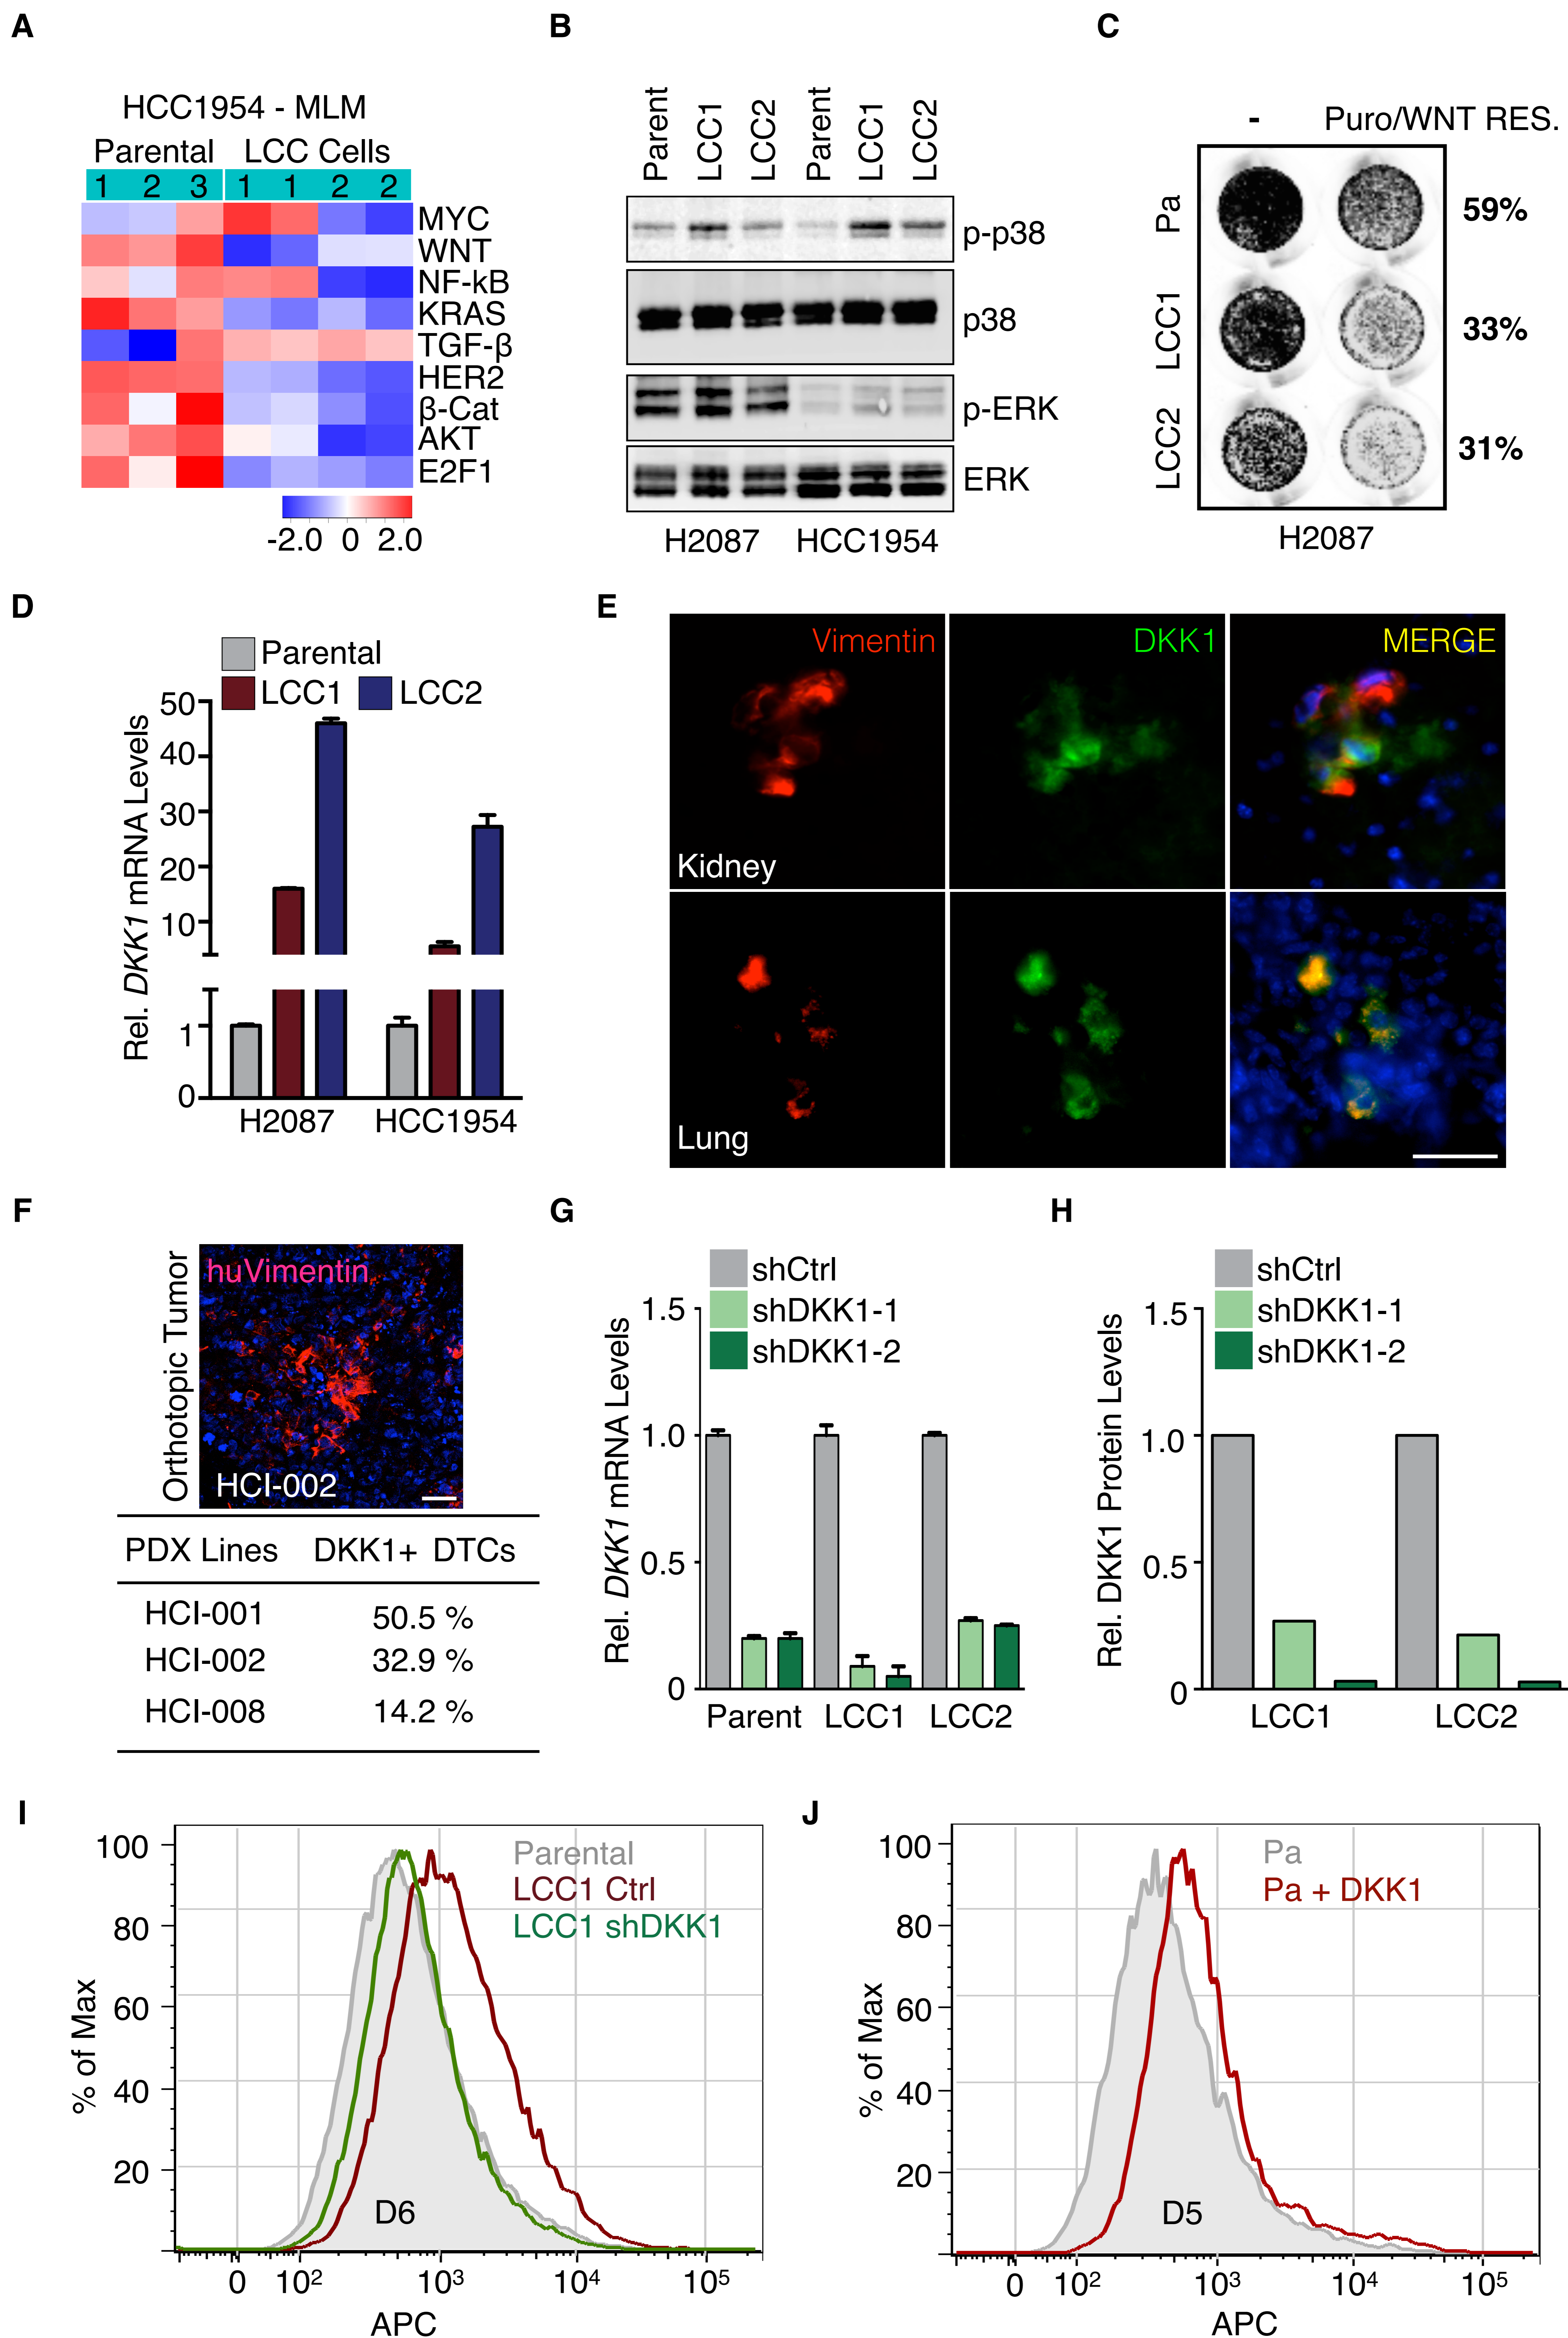

Supplement: NIHMS768018-supplement-8.pdf [file NIHMS768018-supplement-8.pdf]

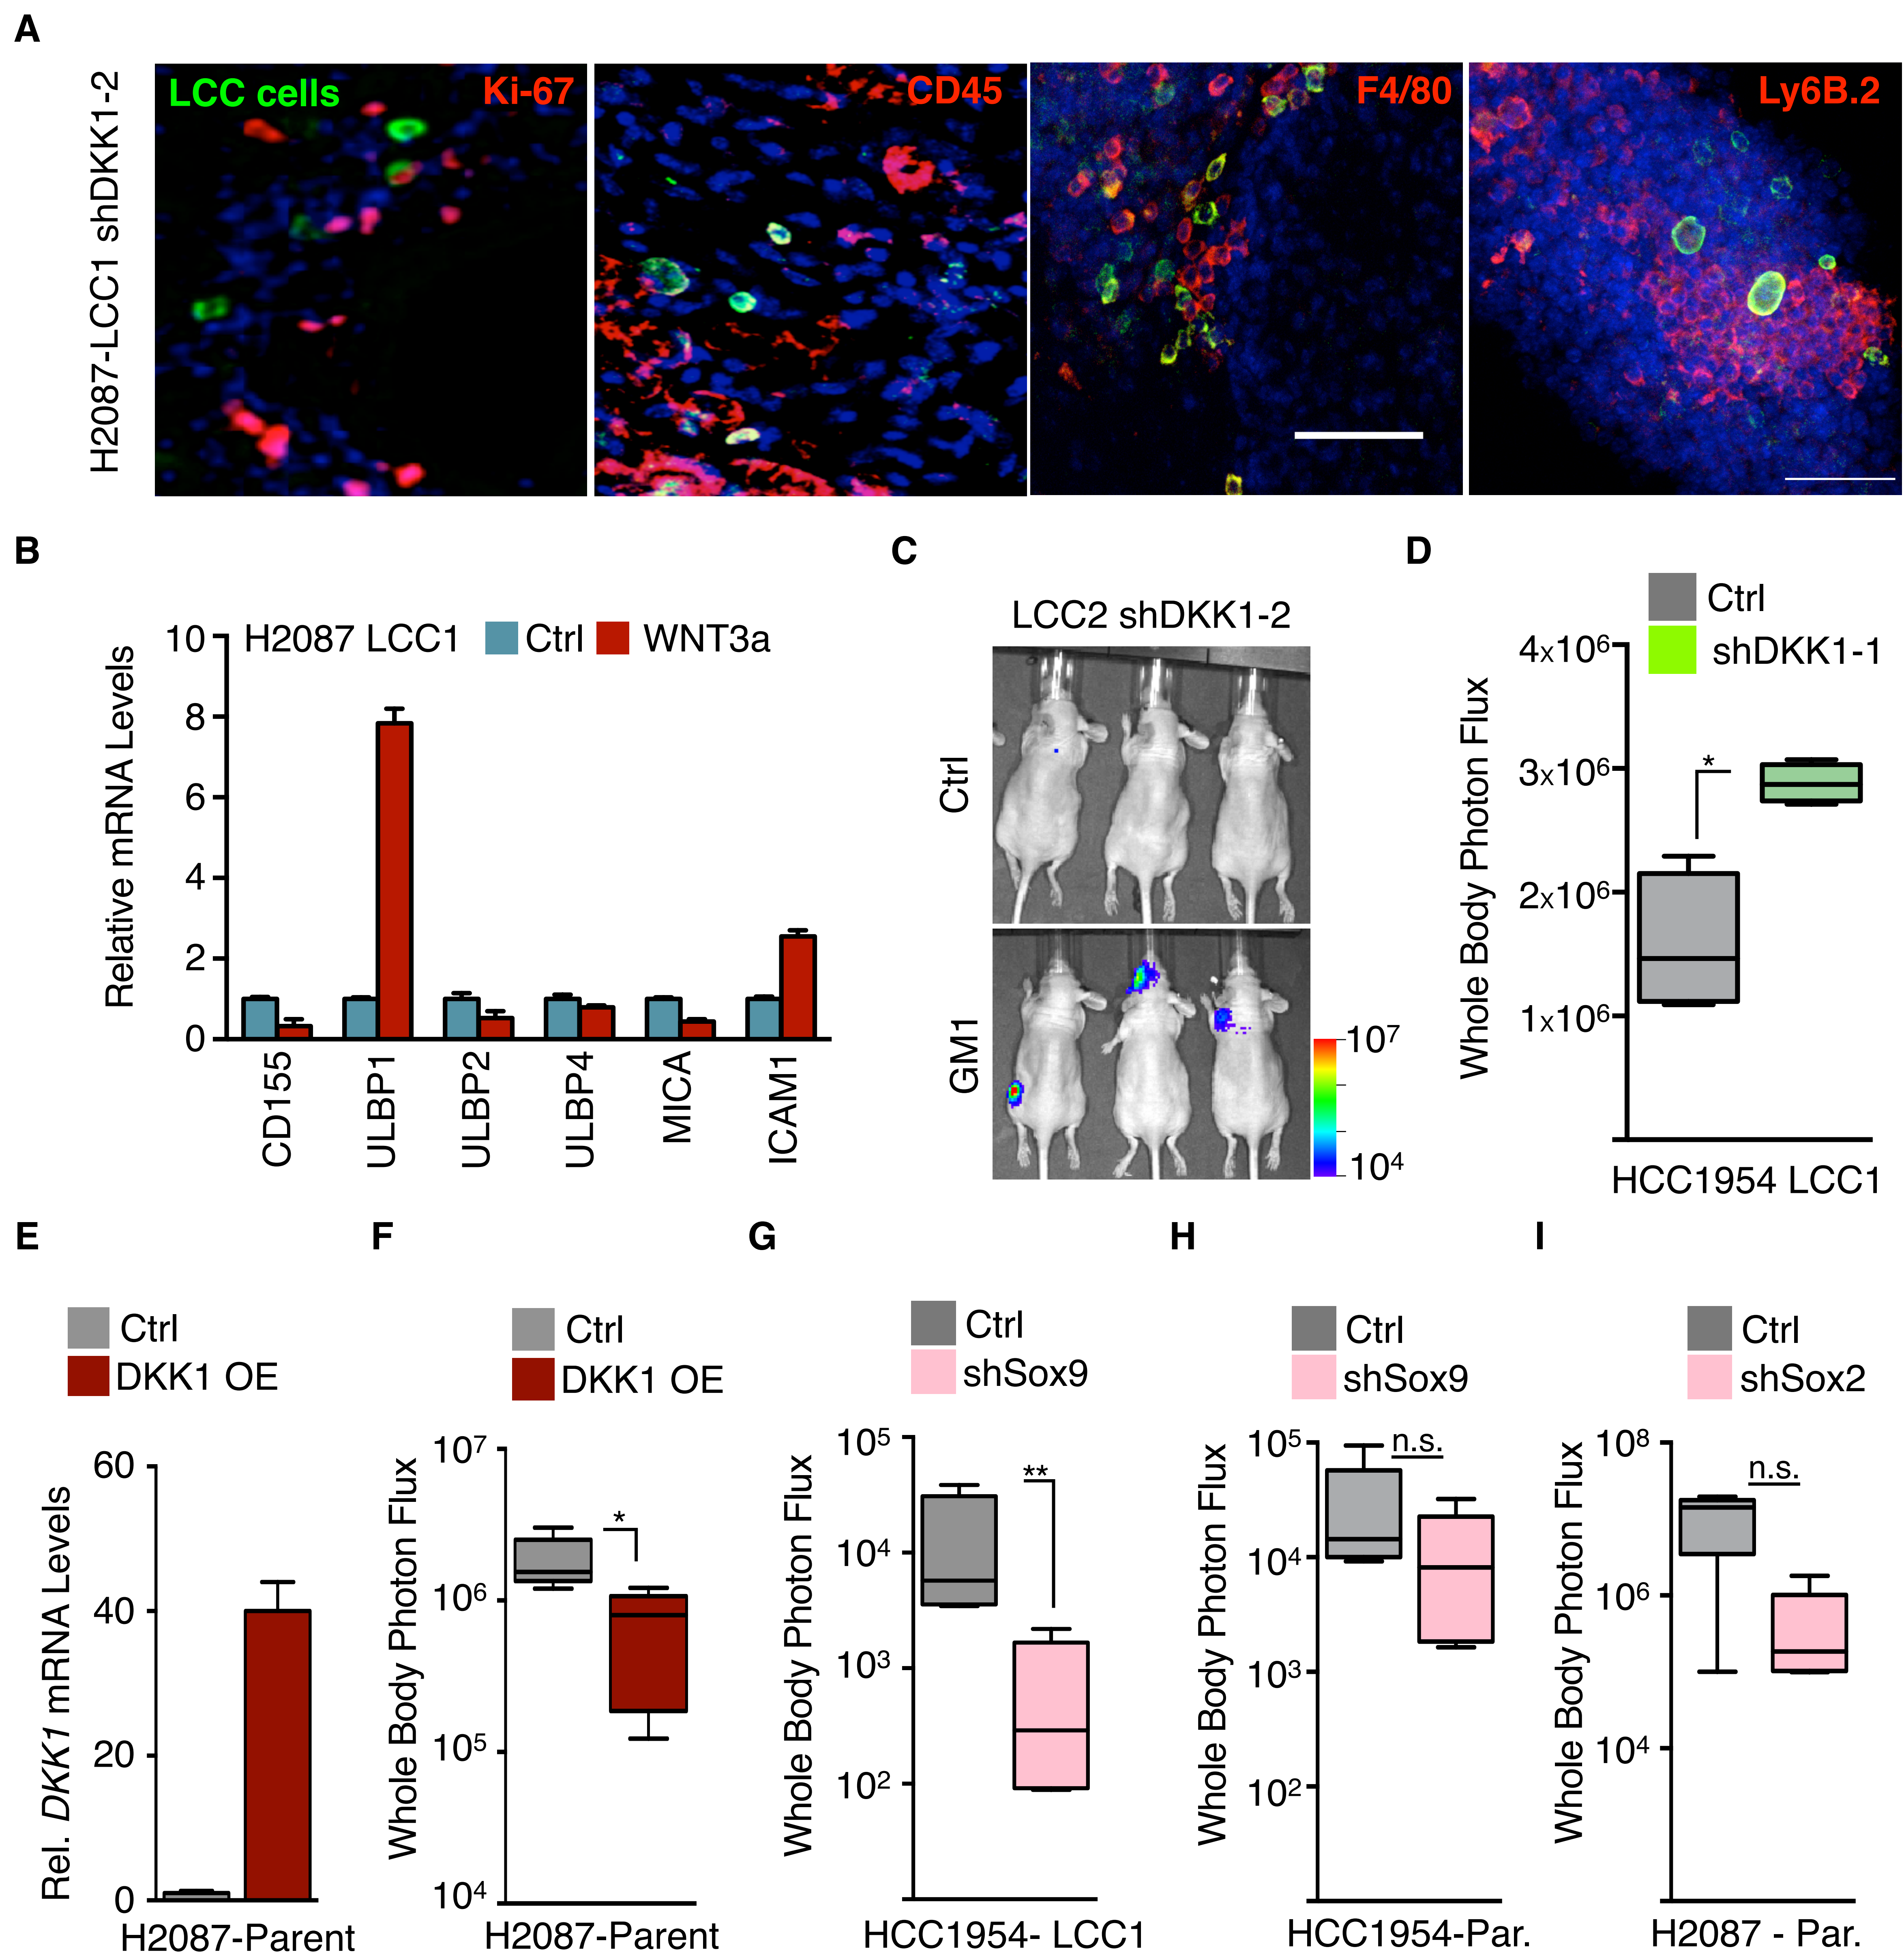

Supplement: NIHMS768018-supplement-9.pdf [file NIHMS768018-supplement-9.pdf]
